# Supplementary material for: The surface reconstruction induced enhancement of the oxygen evolution reaction on α-SnWO4 (010) based on a density functional theory study
Source: Royal Society of Chemistry journal article supplement (doi:10.1039/d2cp02159e), 2022-01-01
Supplement: d2cp02159e1.pdf [file d2cp02159e1.pdf]

## Supplementary Information

### The surface reconstruction induced enhancement of the oxygen evolution reaction on $\alpha$ -SnWO<sub>4</sub> (010) based on a density functional theory study

Wentao Wang\*<sup>1</sup>, Yonggang Wu\*<sup>2</sup>, Deliang Chen<sup>2</sup>, Hongling Liu<sup>2</sup>, Mei Xu<sup>3</sup>, Xuefei Liu<sup>3</sup>,  
Lipeng Xin\*<sup>4</sup>

<sup>1</sup>Guizhou Provincial Key Laboratory of Computational Nano-Material Science, Guizhou  
Education University, Guiyang 550018, China

<sup>2</sup> School of Physics and Electronic Science, Guizhou Education University, Guiyang 550018,  
China

<sup>3</sup>School of Physical and Electronic Sciences, Guizhou Normal University, Guiyang 550025, China

<sup>4</sup>Frontier Institute of Science and Technology, Xi'an Jiaotong University, Xi'an 710049, China

\*E-mail: wuli8@163.com (W. Wang, <https://orcid.org/0000-0003-4308-3515>);

wuyonggang@gznc.edu.cn (Y. Wu); chemphysxin@163.com (L. Xin)

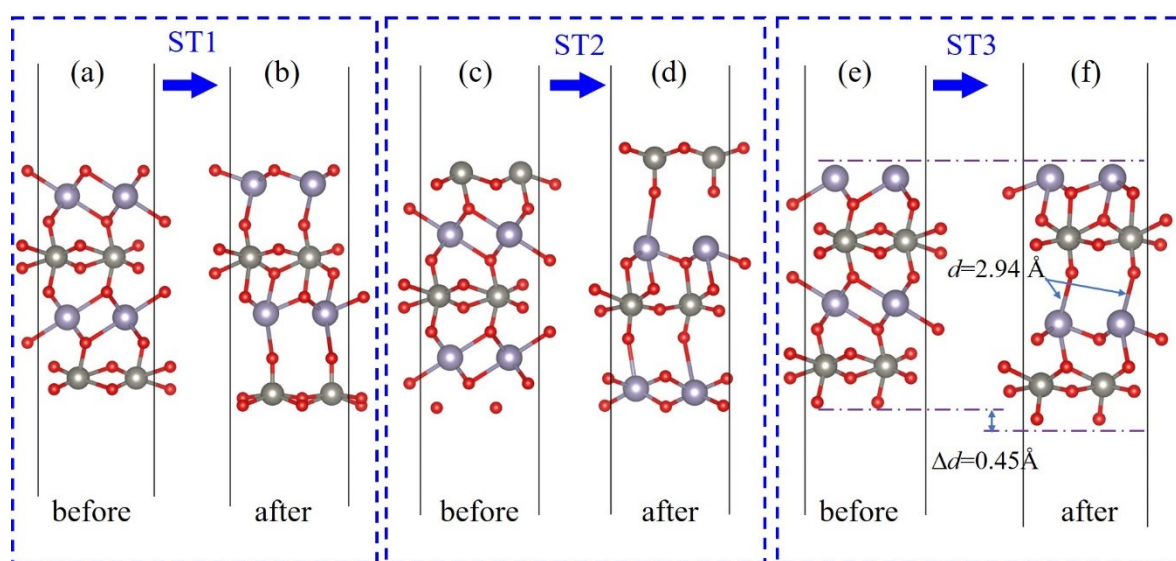

**Fig. S1.** Side view of three possible stoichiometric structures of  $\alpha$ -SnWO<sub>4</sub> (010): (a) ST1, (c) ST2, and (e) ST3 are the structures before optimization, and (b), (d), and (f) are after optimization, respectively. The red, gray and light blue balls represent O, W, and Sn atoms.

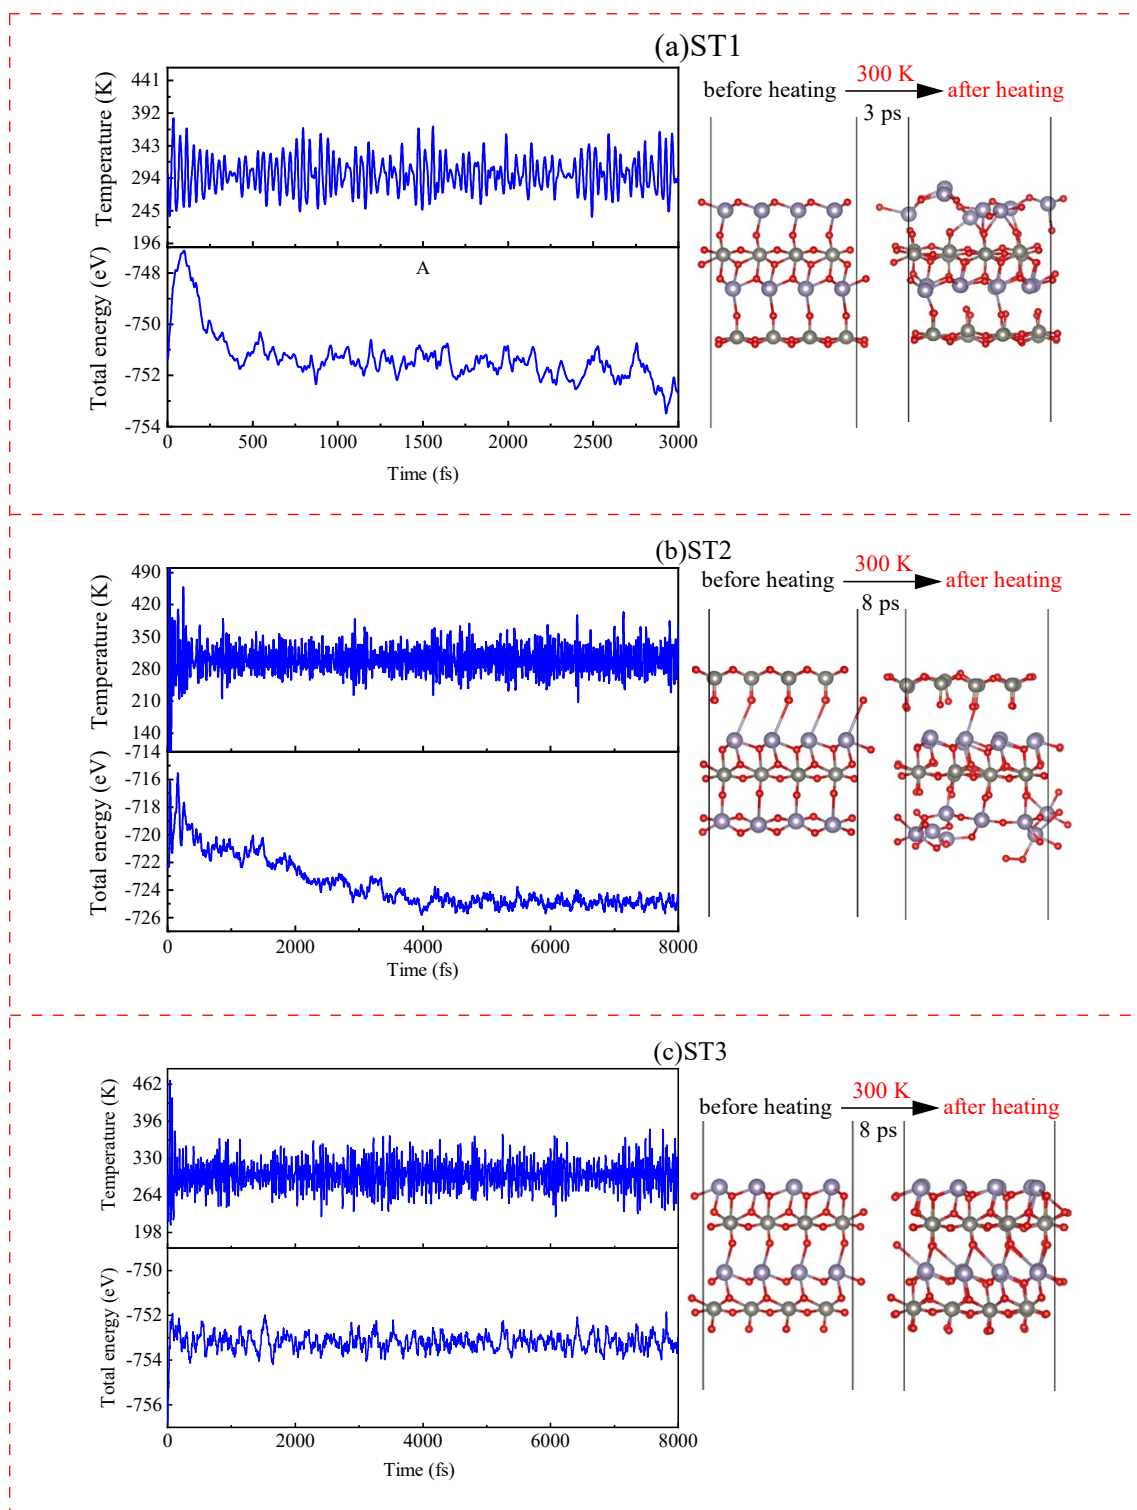

**Fig. S2.** Variations of temperature and energy plotted as a function of time for AIMD simulations of (a) ST1 (b)ST2, and (c)ST3 terminations under 300 K for 8 ps with a time step of 1fs. The right parts show the termination structures at 0 ps and 8 ps.

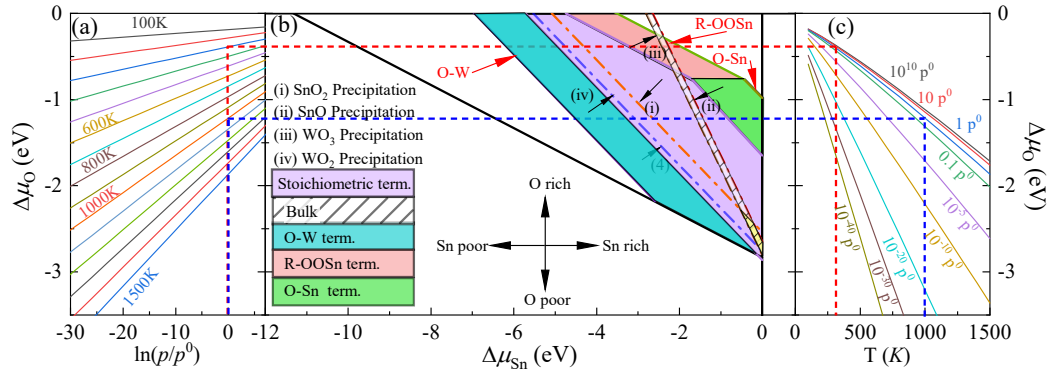

**Fig. S3.** (a) The  $\Delta\mu_{\text{O}}$  as a function of oxygen gas pressure at various temperatures according to Equation (20), (b) the phase diagrams for  $\alpha\text{-SnWO}_4$  (010) surface with different terminations (including O-Sn term., M-Sn term., R-OOW term., O-W term., W-O term., R-OOSn term., and ST3 term.) as functions of chemical potential variations for Sn and oxygen atoms, (c) the  $\Delta\mu_{\text{O}}$  as a function of temperature at various oxygen gas pressures. All total energies are obtained using the PBE method.

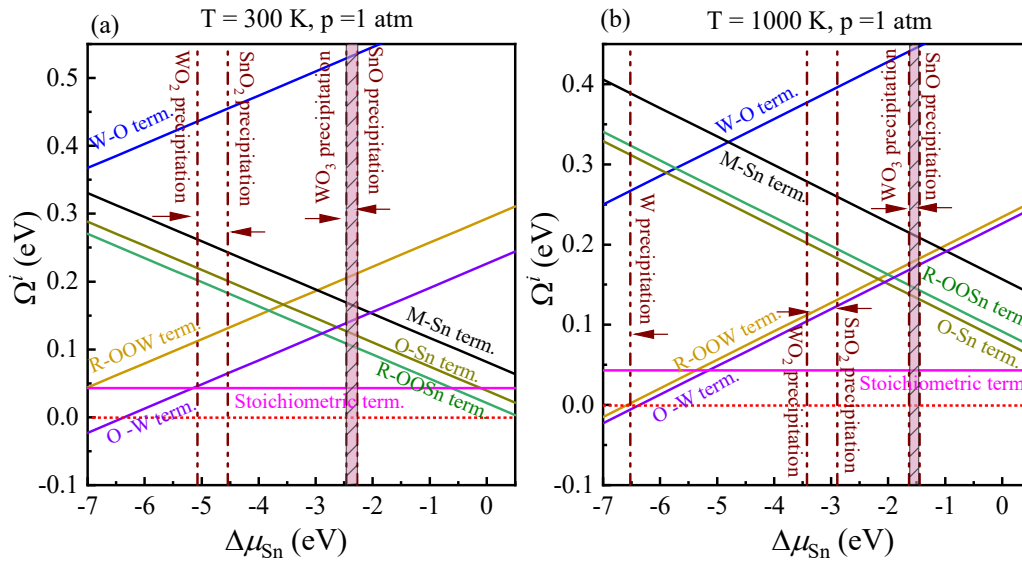

**Fig. S4.** Surface Gibbs free energies as a function of  $\Delta\mu_{\text{Sn}}$  at a certain temperature and pressure for  $\alpha\text{-SnWO}_4$  (010) surface using the PBE method (a) at  $T = 300\text{K}$  and (b)  $T = 1000\text{K}$ .

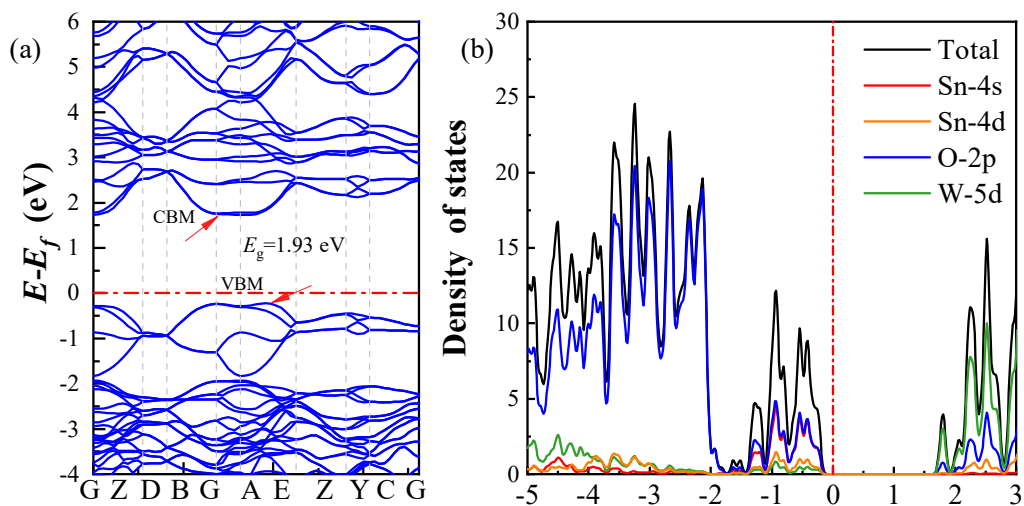

**Fig. S5.** The (a)Band structures, (b)TDOS and PDOS of bulk  $\alpha$ -SnWO<sub>4</sub> are obtained from HSE06 calculations. The Fermi level is set to zero and indicated by the red dotted-dashed line.

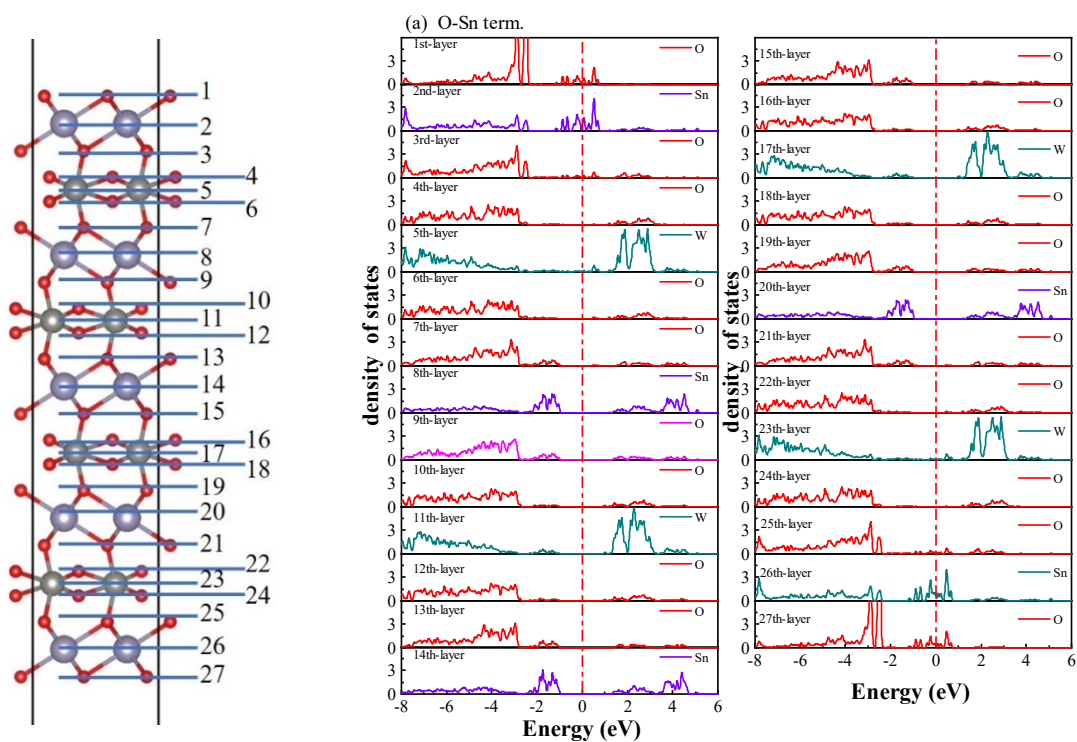

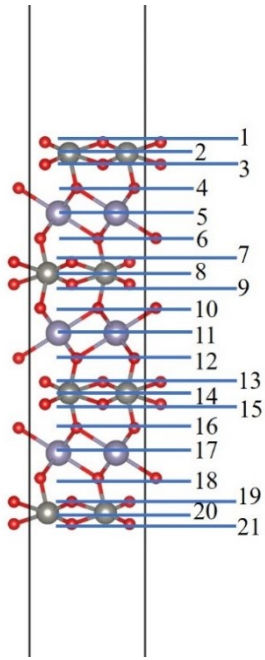

(b) O-W term.

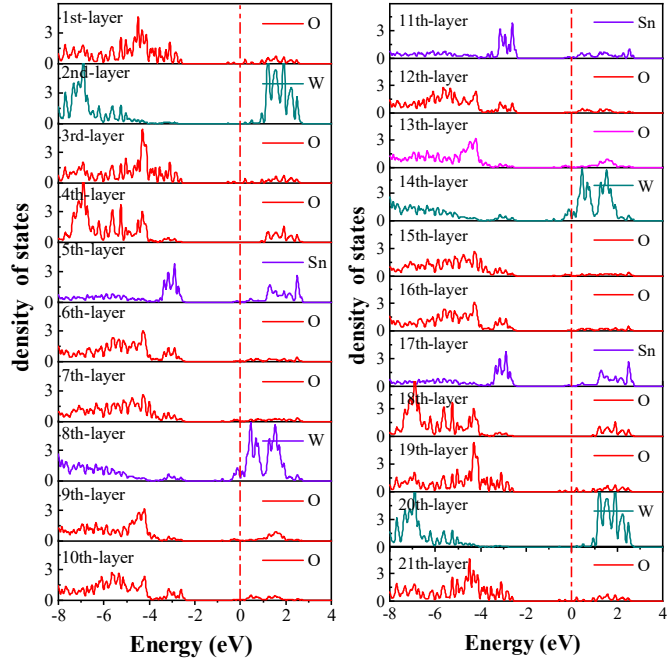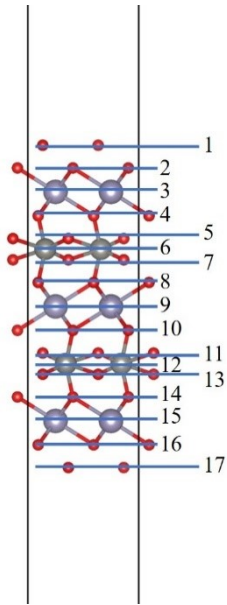

(c) R-OOSn term.

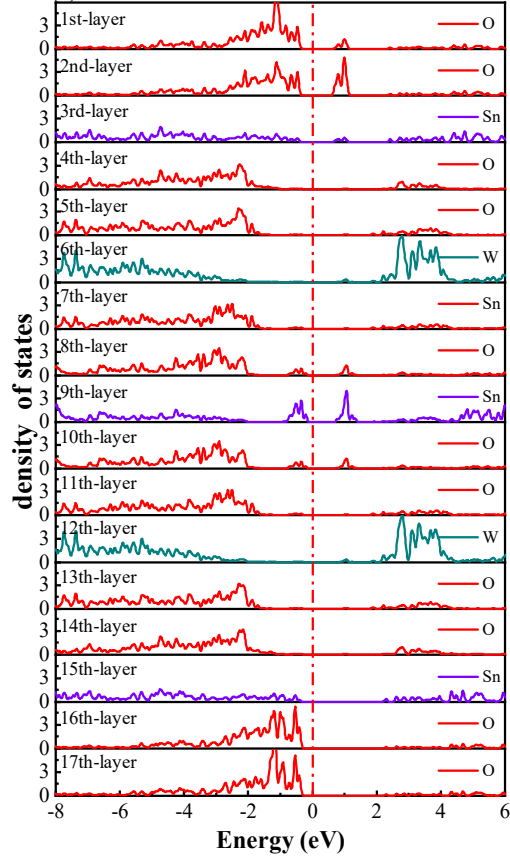

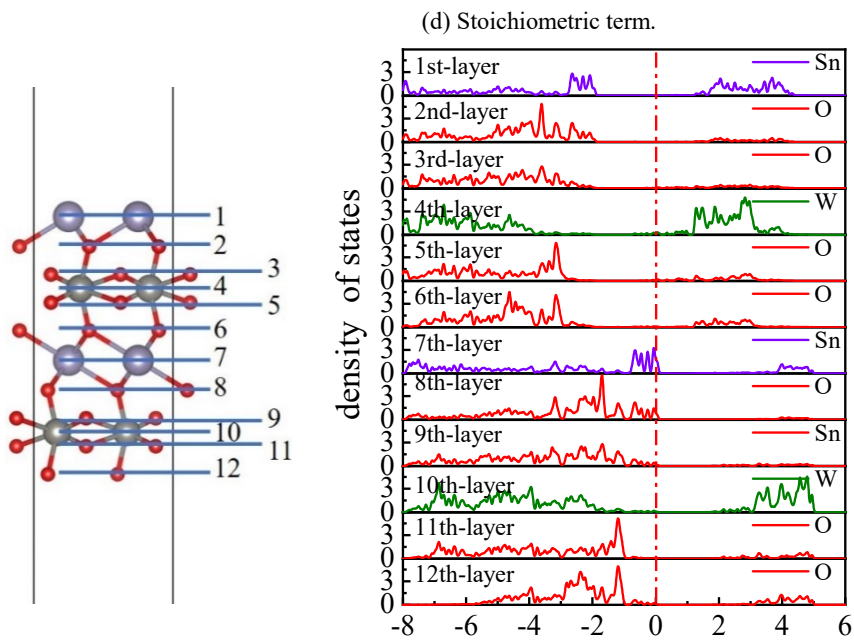

**Fig. S6.** The layer-resolved density of states of (a) O-Sn term., (b) O-W term. (c) R-OOSn term. and ST3 term., for  $\text{SnWO}_4$  (010) surfaces, which are obtained from HSE06 calculations. The Fermi level is set to zero and indicated by a perpendicular red dot-dash line. The numbers represent the number of atomic layers for  $\alpha\text{-SnWO}_4$  (010) surfaces

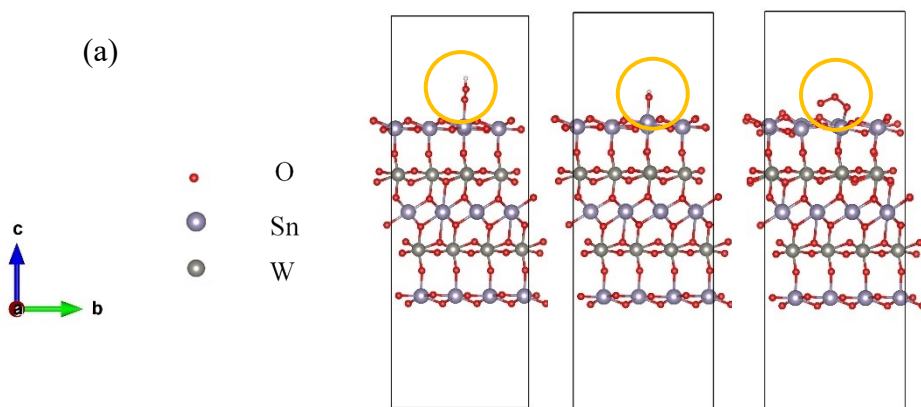



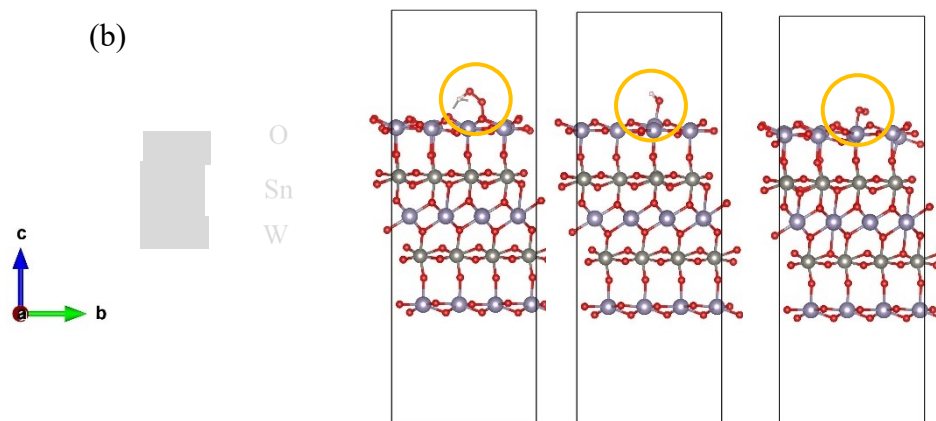

**Fig. S7.** The optimized structures for O\*, OH\*, and OOH\* intermediates on the O-Sn termination of  $\alpha$ -SnWO<sub>4</sub> (010) surfaces at different (a) and (b) sites.

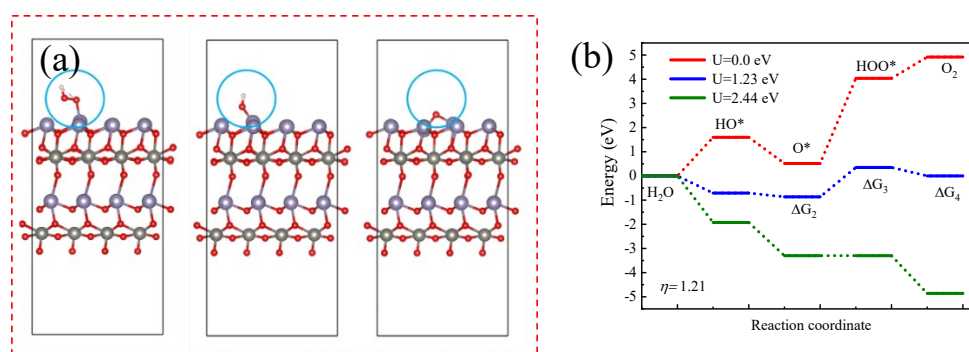

**Fig. S8.** The free energy profile for OER on the ST3 termination of  $\alpha$ -SnWO<sub>4</sub>(010) surface at different voltages. The optimized structures for O\*, OH\* and OOH\* intermediates on the (b)ST3 termination of  $\alpha$ -SnWO<sub>4</sub> (010) surfaces.

### Note S1 Computational hydrogen electrode

For the OER reaction, four elementary steps are usually needed to proceed, as listed in equations (1) to (4), which involve adsorbed OH, O and OOH species on the surface (\*):

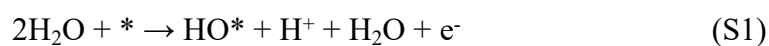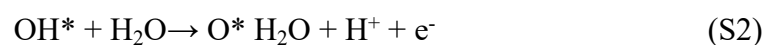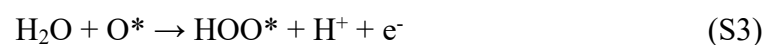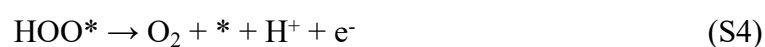

The above mechanism is the most common one of the water-splitting on semiconductor surfaces. It involves the dehydrogenation of H<sub>2</sub>O, followed by the dissociation of HO\* to O\*. Subsequently, O\* reacts with another H<sub>2</sub>O to generate HOO\*, which then dehydrogenates to O<sub>2</sub>.

The Gibbs free energy change for steps 1–4 can be expressed as

$$\Delta G_1 = \Delta G(\text{OH}_{ads}) - eU + \Delta G_{\text{H}^+}(\text{pH}) \quad (\text{S5})$$

$$\Delta G_2 = \Delta G(\text{O}_{ads}) - \Delta G(\text{OH}_{ads}) - eU + \Delta G_{\text{H}^+}(\text{pH}) \quad (\text{S6})$$

$$\Delta G_3 = \Delta G(\text{OOH}_{ads}) - \Delta G(\text{O}_{ads}) - eU + \Delta G_{\text{H}^+}(\text{pH}) \quad (\text{S7})$$

$$\Delta G_4 = 4.92 - \Delta G(\text{OOH}_{ads}) - eU + \Delta G_{\text{H}^+}(\text{pH}) \quad (\text{S8})$$

where U is the potential measured against normal hydrogen electrode (NHE) at standard conditions (T = 298.15 K, P = 1 bar, pH = 0). The free energy change of the protons relative to the above specified electrode at non-zero pH is represented by Nernst equation as  $\Delta G_{\text{H}^+}(\text{pH}) = -k_{\text{B}}T \ln(10) \times \text{pH}$ . The sum of  $\Delta G_{1-4}$  is fixed to the negative of experimental Gibbs free energy of formation of two water molecules  $-2 \Delta G_{\text{H}_2\text{O}}^{\text{exp}} = 4 \times 1.23 = 4.92$  eV to avoid calculating the O bond energy, which is difficult to determine accurately within GGA-DFT. The Gibbs free energies of eqs 5–8 depend on the adsorption energies of OH\*, O\*, and OOH\*. To compute the free energy change ( $\Delta G$ ) of each elementary step of electrochemical urea synthesis, we adopted the computational hydrogen electrode model developed by Nørskov et al.<sup>1</sup> according to which the  $\Delta G$  of an electrochemical reaction is defined as:  $\Delta G_i = \Delta E_i + \Delta \text{ZPE}_i - T\Delta S_i$ , where i means OH\*, O\* and OOH\*. ZPE and S are the zero-point energy and entropy corrections, respectively. The energy differences  $\Delta E_i$  calculated relative to H<sub>2</sub>O and H<sub>2</sub> (at U = 0 and pH = 0) as

$$\Delta E_{\text{DFT}}(\text{OH}^*) = E_{\text{DFT}}(\text{OH}^*) - E(*) - [E_{\text{DFT}}(\text{H}_2\text{O}) - 1/2 * E_{\text{DFT}}(\text{H}_2)] \quad (\text{S9})$$

$$\Delta E_{\text{DFT}}(\text{O}^*) = E_{\text{DFT}}(\text{O}^*) - E(*) - [E_{\text{DFT}}(\text{H}_2\text{O}) - E_{\text{DFT}}(\text{H}_2)] \quad (\text{S10})$$



$$\Delta E_{\text{DFT}}(\text{OOH}^*) = E_{\text{DFT}}(\text{OOH}^*) - E(*) - [2 * E_{\text{DFT}}(\text{H}_2\text{O}) - 3/2 * E_{\text{DFT}}(\text{H}_2)] \quad (\text{S11})$$

The theoretical overpotential is then readily defined as:

$$\eta = \max[\Delta G_1, \Delta G_2, \Delta G_3, \Delta G_4] / e - 1.23 [\text{V}] \quad (\text{S12})$$

The entropies of gas-phase  $\text{H}_2$  is obtained from the NIST database<sup>2</sup> with the standard condition, and the adsorbed species were only taken vibrational entropy ( $S_v$ ) into account, as shown in the following formula:

$$S_v = \sum_i R \left\{ \frac{h\nu_i}{k_B T} \left[ \exp\left(\frac{h\nu_i}{k_B T}\right) - 1 \right]^{-1} - \ln \left[ 1 - \exp\left(-\frac{h\nu_i}{k_B T}\right) \right] \right\} \quad (\text{S13})$$

Among which  $R = 8.314 \text{ J}\cdot\text{mol}^{-1}\cdot\text{K}^{-1}$ ,  $T = 298.15 \text{ K}$ ,  $h = 6.63 \times 10^{-34} \text{ J}\cdot\text{s}$ ,  $k_B = 1.38 \times 10^{-23} \text{ J}\cdot\text{K}^{-1}$ ,  $i$  is the frequency number,  $\nu_i$  is the vibrational frequency (unit is  $\text{cm}^{-1}$ ).

1. J. K. Nørskov, J. Rossmeisl, A. Logadottir, L. Lindqvist, J. R. Kitchin, T. Bligaard and H. Jónsson, *J. Phys. Chem. B*, 2004, **108**, 17886-17892.
2. R. D. J. III, *NIST Computational Chemistry Comparison and Benchmark Database*, 2022.
